1 **Combining fine-scale social contact data with epidemic modelling**  
2 **reveals interactions between contact tracing, quarantine, testing and**  
3 **physical distancing for controlling COVID-19**

4  
5 Josh A. Firth<sup>1,2</sup>, Joel Hellewell<sup>3</sup>, Petra Klepac<sup>3,4</sup>, Stephen Kisslers<sup>5</sup>, CMMID COVID-19 working  
6 group, Adam J. Kucharski<sup>3</sup>, Lewis G. Spurgin<sup>6\*</sup>

7  
8 1. Department of Zoology, University of Oxford, Oxford, UK

9 2. Merton College, University of Oxford, Oxford, UK

10 3. Centre for the Mathematical Modelling of Infectious Diseases, Department of Infectious Disease  
11 Epidemiology, London School of Hygiene & Tropical Medicine, London, UK

12 4. Department for Applied Mathematics and Theoretical Physics, University of Cambridge

13 5. Department of Immunology and Infectious Diseases, Harvard T.H. Chan School of Public  
14 Health, Boston MA

15 6. School of Biological Sciences, University of East Anglia, Norwich, UK

16  
17 **\*Correspondence:** [l.spurgin@uea.ac.uk](mailto:l.spurgin@uea.ac.uk)

18  
19 *CMMID COVID-19 working group members (order selected at random): Mark Jit, Katherine E.*

20 *Atkins, Samuel Clifford, C Julian Villabona-Arenas, Sophie R Meakin, Charlie Diamond, Nikos I*

21 *Bosse, James D Munday, Kiesha Prem, Anna M Foss, Emily S Nightingale, Kevin van Zandvoort,*

22 *Nicholas G. Davies, Hamish P Gibbs, Graham Medley, Amy Gimma, Stefan Flasche, David*

23 *Simons, Megan Auzenberg, Timothy W Russell, Billy J Quilty, Eleanor M Rees, Quentin J*

24 *Leclerc, W John Edmunds, Sebastian Funk, Rein M G J Houben, Gwenan M Knight, Sam Abbott,*

25 *Fiona Yueqian Sun, Rachel Lowe, Damien C Tully, Simon R Procter, Christopher I Jarvis, Akira*

26 *Endo, Kathleen O'Reilly, Jon C Emery, Thibaut Jombart, Alicia Rosello, Arminder K Deol, Matthew*

27 *Quaire, Stephanie Hue, Yang Liu, Rosalind M Eggo, Carl A B Pearson*

NOTE: This preprint reports new research that has not been certified by peer review and should not be used to guide clinical practice.

28 **Abstract**

29 Case isolation and contact tracing can contribute to the control of COVID-19 outbreaks<sup>1,2</sup>.  
30 However, it remains unclear how real-world networks could influence the effectiveness and  
31 efficiency of such approaches. To address this issue, we simulated control strategies for SARS-  
32 CoV-2 in a real-world social network generated from high resolution GPS data<sup>3,4</sup>. We found that  
33 tracing contacts-of-contacts reduced the size of simulated outbreaks more than tracing of only  
34 contacts, but resulted in almost half of the local population being quarantined at a single point in  
35 time. Testing and releasing non-infectious individuals led to increases in outbreak size, suggesting  
36 that contact tracing and quarantine may be most effective when it acts as a 'local lockdown' when  
37 contact rates are high. Finally, we estimated that combining physical distancing with contact  
38 tracing could enable epidemic control while reducing the number of quarantined individuals. Our  
39 approach highlights the importance of network structure and social dynamics in evaluating the  
40 potential impact of SARS-CoV-2 control.

41 **Main**

42 Non-pharmaceutical interventions (NPIs) are central to reducing SARS-CoV-2 transmission<sup>5–8</sup>.  
43 Such responses generally include: case isolation, tracing and quarantining of contacts, use of PPE  
44 and hygiene measures, and policies designed to encourage physical distancing (including closures  
45 of schools and workplaces, banning of large public events and restrictions on travel). Due to the  
46 varying economic and social costs of these interventions, there is a clear need for sustainable  
47 strategies that limit SARS-CoV-2 transmission while reducing disruption as far as possible.

48  
49 Isolation of symptomatic cases, and quarantine of their contacts (e.g. household members), is a  
50 common public health strategy for reducing disease spread<sup>1,2,8</sup>. This approach has been used as  
51 part of SARS-CoV-2 control strategies<sup>9</sup>. However, the relatively high reproduction number of the  
52 SARS-CoV2 virus in early outbreak stages<sup>10,11</sup>, alongside likely high contribution to transmission  
53 from presymptomatic and asymptomatic individuals<sup>12</sup>, means that manual tracing of contacts alone  
54 may not be a sufficient containment strategy under a range of outbreak scenarios<sup>13</sup>. As countries  
55 relax lockdowns and other more stringent physical distancing measures, combining the isolation of  
56 symptomatic individuals and quarantine of contacts identified through fine-scale tracing is likely to  
57 play a major role in many national strategies for targeted SARS-CoV-2 control<sup>14</sup>.

58  
59 It is possible to assess the potential effectiveness of contact tracing by simultaneously modelling  
60 disease spread and contact tracing strategies through social systems of individuals<sup>15</sup>. These  
61 systems are usually simulated through parameterisation with simple social behaviours (e.g. the  
62 distribution of the number of physical contacts per individual). Further still, social systems may be  
63 simulated as networks that can be parameterised according to assumptions regarding different  
64 contexts (for example, with different simulated networks for households, schools and workplaces),  
65 or using estimated contact rates of different age groups<sup>16</sup>. However, much less is known about  
66 how different types of real-world social behaviour and the hidden structure found in real-life  
67 networks may affect both patterns of disease transmission and efficacy of contact tracing under  
68 different scenarios<sup>17,18</sup>. Examining contagion dynamics and control strategies using a ‘real-world’

69 network allows for a more realistic simulation of SARS-CoV-2 outbreak and contact tracing  
70 dynamics.

71

72 Here we develop an epidemic model which simulates COVID-19 outbreaks across a real-world  
73 network, and we assess the impact of a range of testing and contact tracing strategies for  
74 controlling these outbreaks (Table 1). We then simulate physical distancing strategies and quantify  
75 how the interaction between physical distancing, contact tracing and testing affects outbreak  
76 dynamics.

77

78 We used a publicly available dataset on human social interactions collected specifically for  
79 modelling infectious disease dynamics as part of the British Broadcasting Corporation (BBC)  
80 documentary “Contagion! The BBC Four Pandemic”. The high-resolution data collection focused  
81 on residents of the town of Haslemere, where the first evidence of UK-acquired infection with  
82 SARS-CoV-2 would later be reported in late February 2020<sup>19</sup>. Previous analyses of this dataset  
83 have shown that it is structurally relevant to modelling disease spread, and hence holds substantial  
84 potential for understanding and controlling real-world diseases<sup>4</sup>. Here, we defined dyadic contacts  
85 on a day-by-day basis as at least one daily 5 min period with a distance of 4 m (see Methods),  
86 which gave 1616 daily contact events and 1257 unique social links between 468 individuals. The  
87 social network defined in this way was strongly correlated ( $r > 0.85$  in all cases) with social  
88 networks based on other contact distances (from 1-7 m contact ranges; Extended Data Fig. 1).  
89 Similarly, social networks created using different time-periods for weighting the dyadic contacts  
90 (Extended Data Fig. 2) were also strongly related to the weighting used here (i.e. number of days  
91 seen together). As such, this social network quantification gives a representative indication of daily  
92 contact propensities within the relevant transmission range between individuals (see Methods) and  
93 also captures various aspects of the patterns and structure presented by different quantifications of  
94 this social system.

95

96 Example outbreaks across the Haslemere social network under different control scenarios are  
97 displayed in Fig. 1, with a full animated visualisation in Supplementary Video 1, and a Shiny app is  
98 available to run individual outbreak simulations (see data sharing). Across all simulations, our  
99 epidemic model showed that uncontrolled outbreaks in the Haslemere network stemming from a  
100 single infected individual resulted in a median of 75% (IQR = 74%-76%) of the population infected  
101 after 70 days (Fig. 2). Isolation when symptomatic resulted in 66% (65%-67%) of the population  
102 infected, while primary contact tracing resulted in 48% (46%-50%) infected. Secondary contact  
103 tracing resulted in the smallest percentage (16%, 14%-19%) of the population infected after 70  
104 days. The number of quarantined individuals was very high under both primary and secondary  
105 contact tracing, with a median of 43% (IQR = 32%-52%) of the population quarantined during the  
106 outbreak peak with the latter (Fig. 2). Examining temporal dynamics showed that outbreak peaks  
107 typically occurred within the first 1-3 weeks, and that interventions reduced the overall size of the  
108 outbreaks as well as their growth rate (Fig. 2). The number of people required to isolate or  
109 quarantine followed a similar trajectory to the number of cases, although under secondary contact  
110 tracing, substantial proportions of the population (27%, 18%-35%) were quarantined even at the  
111 end of the simulations (Fig. 2). This is in line with a large-scale recent simulation model of app-  
112 based contact tracing in the UK<sub>20</sub>, which suggested that contact tracing could be highly effective,  
113 but also that it required large numbers of people to be quarantined. Further, in our (optimistic)  
114 default parameter settings we assumed that 10% of contact tracing attempts were missed. This,  
115 combined with the very large number of quarantined cases under secondary contact tracing (Fig.  
116 2), suggests that a majority of the population could receive a notification that they should  
117 quarantine within the first 2-3 weeks of an outbreak.

118

119 Sensitivity analysis of the efficacy of contact tracing under the epidemic model is presented in  
120 Extended Data Figs 3-6. As expected, outbreak size decreased with the percentage of contacts  
121 traced in all scenarios, and increased with the reproduction number, the proportion of  
122 asymptomatic cases, the proportion of pre-onset transmission, the delay between onset/tracing  
123 and isolation/quarantine, and the number of initial cases (Extended Data Figs 3-6). Outbreak

124 dynamics were strongly affected by outside infection rate across all intervention scenarios, as were  
125 the number of isolated and quarantined cases (Extended Data Fig. 6). Our model therefore  
126 corroborates with models using simulated social systems and showing that, for a disease such as  
127 COVID-19 with high levels of transmission from asymptomatic and presymptomatic individuals,  
128 contact tracing is likely to be most effective when the proportion of traced contacts is high, when  
129 the delay from notification to quarantine is short<sup>13</sup>, and, most importantly, when the number of  
130 starting cases and rate of movement into the network are low. Importantly, however, the tradeoff  
131 between the number of cases and the number of quarantined cases was found across the entirety  
132 of the parameter space (Extended Data Figs 3-6). Further, increasing the network density through  
133 increasing the distance threshold for defining contacts led to broadly similar results across  
134 intervention scenarios, albeit with larger numbers of quarantined cases required for outbreak  
135 control via contact tracing (Extended Data Fig. 7). Therefore, while more real-world networks are  
136 needed to demonstrate how well these results apply to other locations and settings, our results are  
137 robust to a range of epidemiological and network parameters.

138

139 The number of quarantined cases can be reduced through mass testing and release of individuals  
140 who return a negative result. Conversely, if contact rates in the population are high, large-scale  
141 test and release strategies could provide greater opportunity for transmission and decrease the  
142 effectiveness of contact tracing. We therefore assessed how the testing and releasing of isolated  
143 and quarantined subjects might affect the numbers of cases and time spent in isolation and  
144 quarantine, using false positive and false negative rates estimated from empirical data<sup>21,22</sup>  
145 (Supplementary Table 1). We estimated that increasing the testing capacity (and therefore testing  
146 and releasing more quarantined cases) led to substantial increases in outbreak size, especially  
147 under secondary contact tracing (median = 50%, IQR = 48%-52%; Fig. 3A). This result occurred  
148 despite an optimistic false negative rate of 10%, suggesting that the increase in outbreak size with  
149 high testing rates is a result of increased transmission within the network, rather than through  
150 releasing infected cases *per se*. Therefore, secondary tracing may effectively act as a 'local  
151 lockdown' rather than a targeted intervention strategy. High levels of testing did not lead to large

152 reductions in the number of quarantined cases under secondary contact tracing scenarios, and the  
153 number of tests required to reduce the numbers of quarantined cases were large, with 68% (63%-  
154 71%) of the population requiring tests in a single week during outbreak peaks (Fig. 3A). We cannot  
155 be sure to what extent our results will represent larger populations, but the tripartite relationship  
156 between the number of cases, the number of quarantined contacts and the number of tests  
157 required will apply in the majority of scenarios in which rates of social interaction are high.

158

159 A very high notification and quarantine rate for any contact tracing system may have  
160 consequences for adherence. Our model is optimistic in its assumption that individuals isolate  
161 independently of previous notifications or isolations, and highly optimistic in its assumption of  
162 100% adherence to quarantine among traced contacts. In reality a high notification and quarantine  
163 rate may result in individuals being less likely to undertake quarantine in the future, which in turn  
164 will impact outbreak dynamics. There is a need for more evidence and models to better understand  
165 these behavioural dynamics, in order to develop sustainable intervention strategies<sup>23</sup>. One  
166 suggested solution to reduced adherence to quarantine is through (digital) targeted quarantine  
167 requests to the individuals at highest risk of infection, or to those most likely to spread to others<sup>24</sup>.  
168 To what extent these interventions will be needed, and how well they will work, is not yet clear;  
169 however, our study provides a methodological template for network-based research into SARS-  
170 CoV2 and its potential control strategies.

171

172 Combining contact tracing with other physical distancing measures may allow for outbreak control  
173 while reducing the number of people in quarantine, and the number of tests required. We  
174 simulated physical distancing by reducing the number of weak links in the Haslemere network. We  
175 aimed to consider low to moderate levels of physical distancing, so used a model whereby the only  
176 interactions with 'rare' contacts are removed. We found that, across all scenarios, physical  
177 distancing led to reductions in the number of overall cases (Fig. 3B). Importantly, increasing  
178 physical distancing was associated with lower numbers of quarantined cases, which was reduced  
179 to as little as 6% (3%-9%) during outbreak peaks under secondary contact tracing (Fig. 3B).

180 Simulating physical distancing using an alternative approach whereby removed ‘rare’ contacts  
181 were reassigned to existing contacts (see methods) yielded similar results to our simpler model,  
182 although using this approach, physical distancing led to smaller decreases in outbreak size  
183 (Extended Data Fig. 8). We do not have information on household structure within the Haslemere  
184 dataset, but our physical distancing scenario is analogous to decreasing the level of non-  
185 household contacts. Therefore it may be that combining measures that reduce non-household  
186 contact rates with highly effective contact tracing may be a useful tool for control of SARS-CoV-2  
187 spread. However, further work is required to determine exactly what kinds of physical distancing  
188 measures would enable effective outbreak control alongside contact tracing. Furthermore, future  
189 investigations could also examine how the spread of the disease itself may shape behavioural  
190 change interventions (e.g. where large outbreaks spark more severe physical distancing  
191 measures), and how this feedback may shape the contagion dynamics and predicted effectiveness  
192 of interventions.

193

194 Network structure can have substantial effects on epidemic model predictions<sup>25,26</sup>. To investigate  
195 this, we used null network models based on the Haslemere data, which maintained the same  
196 number of individuals, connections and weights of connections, but shuffled network architecture in  
197 different ways (see Methods). The number of cases estimated using the null networks was broadly  
198 similar to the real-world network, although this was substantially underestimated in a ‘lattice’ like  
199 network (Fig. 4). Importantly, the rate of quarantine varied substantially among the null networks,  
200 especially under secondary contact tracing (Fig. 4). These results demonstrate that the use of  
201 network-based simulations of SARS-CoV-2 dynamics requires caution, as even if such models had  
202 precise information on the number of individuals and amount of social interactions occurring within  
203 a system, the assumed architecture of the social network structure alone can shape predictions for  
204 both the extent of spread and the usefulness of control strategies. Furthermore, through providing  
205 insight into how changes to network structure influences contagion dynamics, the null network  
206 simulation approach gives some indication of how this contagion and associated control strategies  
207 may operate in different social environments. For instance, different social structures may arise



208 when considering particular social settings (e.g. workplaces, commuting), some of which may be  
209 closer to the null networks generated here. Considering this structure will lead to improved  
210 predictions of outbreak dynamics.

211

212 There are a number of important limitations to our study and the current availability of empirical  
213 data in general. Most importantly, this social network is taken from a single, small town and over a  
214 short period of time, and we do not know to what extent the social dynamics will be applicable to  
215 larger cities and other contexts and over long periods. Therefore, future large-scale efforts in  
216 gathering data on dynamic fine-scale social behaviour over long periods of time (ideally over the  
217 entire contagion period) in major cities would be of great benefit for assessing the relative uses of  
218 SARS-CoV-2 control strategies, and for understanding how and why interventions implemented in  
219 some cities have been relatively more successful than others<sup>27</sup>. Indeed, the epidemic network-  
220 based model provided here can be applied generally to more extensive social networks if such  
221 data becomes available in the future. Further, the Haslemere data, while rich, does not sample the  
222 entire population of Haslemere, and children under the age of 13 were not included in the  
223 experiment, which could potentially have an impact on outbreak and social tracking dynamics.  
224 Again, such issues are also likely to be prevalent across real-world contact-tracing attempts, as the  
225 ability to track children will be limited, particularly with app-based approaches that require a  
226 smartphone. It is encouraging that our results broadly align with other, larger-scale simulations of  
227 contact tracing which explicitly model these limitations, but lack the fine-scale social tracking  
228 data<sup>20</sup>. Therefore, by supplying a general framework for simulating the spread of COVID-19 on  
229 real-world networks, we hope to promote integration of multiple real-world social tracking datasets  
230 with epidemic modelling, which may provide a promising way forward for optimising contact tracing  
231 strategies and other non-pharmaceutical interventions.

232

## 233 **References**

- 234 1. Fraser, C., Riley, S., Anderson, R. M. & Ferguson, N. M. Factors that make an infectious  
235 disease outbreak controllable. *Proc. Natl. Acad. Sci. U. S. A.* **101**, 6146–6151 (2004).

- 236 2. Peak, C. M., Childs, L. M., Grad, Y. H. & Buckee, C. O. Comparing nonpharmaceutical  
237 interventions for containing emerging epidemics. *Proc. Natl. Acad. Sci. U. S. A.* **114**, 4023–  
238 4028 (2017).
- 239 3. Kissler, S. M., Klepac, P., Tang, M., Conlan, A. J. K. & Gog, J. R. Sparking ‘The BBC Four  
240 Pandemic’: Leveraging citizen science and mobile phones to model the spread of disease.  
241 *bioRxiv* 479154 (2018) doi:10.1101/479154.
- 242 4. Klepac, P., Kissler, S. & Gog, J. Contagion! The BBC Four Pandemic--The model behind the  
243 documentary. *Epidemics* **24**, 49–59 (2018).
- 244 5. Ferguson, N. *et al.* Report 9: Impact of non-pharmaceutical interventions (NPIs) to reduce  
245 COVID19 mortality and healthcare demand. (2020).
- 246 6. Chinazzi, M. *et al.* The effect of travel restrictions on the spread of the 2019 novel coronavirus  
247 (COVID-19) outbreak. *Science* **368**, 395–400 (2020).
- 248 7. Tian, H. *et al.* An investigation of transmission control measures during the first 50 days of the  
249 COVID-19 epidemic in China. *Science* (2020) doi:10.1126/science.abb6105.
- 250 8. Aleta, A. *et al.* Modeling the impact of social distancing, testing, contact tracing and household  
251 quarantine on second-wave scenarios of the COVID-19 epidemic. *medRxiv* (2020)  
252 doi:10.1101/2020.05.06.20092841.
- 253 9. Chen, S. What’s behind Vietnam’s coronavirus containment success? *South China Morning*  
254 *Post* [https://www.scmp.com/news/asia/southeast-asia/article/3079598/coronavirus-whats-](https://www.scmp.com/news/asia/southeast-asia/article/3079598/coronavirus-whats-behind-vietnams-containment-success)  
255 [behind-vietnams-containment-success](https://www.scmp.com/news/asia/southeast-asia/article/3079598/coronavirus-whats-behind-vietnams-containment-success) (2020).
- 256 10. Kucharski, A. J. *et al.* Early dynamics of transmission and control of COVID-19: a  
257 mathematical modelling study. *Lancet Infect. Dis.* (2020) doi:10.1016/S1473-3099(20)30144-  
258 4.
- 259 11. Klinkenberg, D., Fraser, C. & Heesterbeek, H. The effectiveness of contact tracing in  
260 emerging epidemics. *PLoS One* **1**, e12 (2006).
- 261 12. He, X. *et al.* Temporal dynamics in viral shedding and transmissibility of COVID-19. *Nat. Med.*  
262 (2020) doi:10.1038/s41591-020-0869-5.
- 263 13. Hellewell, J. *et al.* Feasibility of controlling COVID-19 outbreaks by isolation of cases and

- 264 contacts. *Lancet Glob Health* **8**, e488–e496 (2020).
- 265 14. Ferretti, L. *et al.* Quantifying SARS-CoV-2 transmission suggests epidemic control with digital  
266 contact tracing. *Science* (2020) doi:10.1126/science.abb6936.
- 267 15. Eames, K. T. D. & Keeling, M. J. Contact tracing and disease control. *Proc. Biol. Sci.* **270**,  
268 2565–2571 (2003).
- 269 16. Del Valle, S. Y., Hyman, J. M., Hethcote, H. W. & Eubank, S. G. Mixing patterns between age  
270 groups in social networks. *Soc. Networks* **29**, 539–554 (2007).
- 271 17. Kiss, I. Z., Green, D. M. & Kao, R. R. Disease contact tracing in random and clustered  
272 networks. *Proc. Biol. Sci.* **272**, 1407–1414 (2005).
- 273 18. Read, J. M., Eames, K. T. D. & Edmunds, W. J. Dynamic social networks and the implications  
274 for the spread of infectious disease. *J. R. Soc. Interface* **5**, 1001–1007 (2008).
- 275 19. BBC News. Coronavirus patient first to be infected in UK. *BBC* (2020).
- 276 20. Hinch, R. *et al.* *Effective Configurations of a Digital Contact Tracing App: A report to NHSX*.  
277 [https://github.com/BDI-pathogens/covid-19\\_instant\\_tracing](https://github.com/BDI-pathogens/covid-19_instant_tracing) (2020).
- 278 21. Chau, N. V. V. *et al.* The natural history and transmission potential of asymptomatic SARS-  
279 CoV-2 infection. *Infectious Diseases (except HIV/AIDS)* (2020)  
280 doi:10.1101/2020.04.27.20082347.
- 281 22. Cohen, A. N. & Kessel, B. False positives in reverse transcription PCR testing for SARS-CoV-  
282 2. *Epidemiology* (2020) doi:10.1101/2020.04.26.20080911.
- 283 23. West, R., Michie, S., Rubin, G. J. & Amlôt, R. Applying principles of behaviour change to  
284 reduce SARS-CoV-2 transmission. *Nat Hum Behav* **4**, 451–459 (2020).
- 285 24. McCall, B. Shut down and reboot-preparing to minimise infection in a post-COVID-19 era.  
286 *Lancet Digit Health* (2020) doi:10.1016/S2589-7500(20)30103-5.
- 287 25. Keeling, M. J. & Eames, K. T. D. Networks and epidemic models. *J. R. Soc. Interface* **2**, 295–  
288 307 (2005).
- 289 26. Xu, Z. & Sui, D. Z. Effect of Small-World Networks on Epidemic Propagation and Intervention.  
290 *Geogr. Anal.* **41**, 263–282 (2009).
- 291 27. Cohen, J. & Kupferschmidt, K. Countries test tactics in ‘war’ against COVID-19. *Science* **367**,

- 292 1287–1288 (2020).
- 293 28. Cairns, S. J. & Schwager, S. J. A comparison of association indices. *Anim. Behav.* **35**, 1454–  
294 1469 (1987).
- 295 29. Maslov, S. & Sneppen, K. Specificity and stability in topology of protein networks. *Science*  
296 **296**, 910–913 (2002).
- 297 30. Davies, N. G. *et al.* The effect of non-pharmaceutical interventions on COVID-19 cases,  
298 deaths and demand for hospital services in the UK: a modelling study. *Infectious Diseases*  
299 *(except HIV/AIDS)* (2020) doi:10.1101/2020.04.01.20049908.
- 300

301 **Methods**

302

303 *Social tracking data*

304 The Haslemere dataset was generated and described as part of previous work, which gives  
305 detailed description of the characteristics of this dataset and town<sup>3,4</sup>. Briefly, the data were  
306 collected during the 2017/18 *BBC Pandemic* project conducted in Haslemere, Surrey, UK. The  
307 project involved a massive citizen-science experiment to collect social contact and movement data  
308 using a custom-made phone app, and was designed to generate data relevant to understanding  
309 directly transmitted infectious disease<sup>3,4</sup>. Of the 1272 individuals within Haslemere that  
310 downloaded the app, 468 individuals had sufficient data points at a resolution of 1m over three full  
311 days within the focal area for further analysis<sup>3</sup>. All 468 focal individuals were known to have spent  
312 >6hrs within 51.0132;-0.7731SW : 51.1195,-0.6432NE (within Postcode GU27), but the dataset  
313 used here comprises of de-identified proximity data made available as pairwise distances (~1 m  
314 resolution) at 5 min intervals (excluding 11pm-7am)<sup>3</sup>.

315

316 *Social network construction*

317 In our primary analysis, we defined social contacts as events when the average pairwise distances  
318 between individuals within a 5 min time interval (calculated using the Haversine formula for great-  
319 circle geographic distances<sup>3</sup>) are 4 m or less. By doing so, we aimed to capture the majority of  
320 relevant face-to-face contacts (i.e. those that may result in transmission) over 5 min periods,  
321 particularly given the 1 m potential error<sup>3</sup> on the tracking measurement during these short time  
322 intervals. Furthermore, this 4 m threshold is within typical mobile phone Bluetooth ranges for  
323 relatively accurate and reliable detections. Therefore, this contact dataset will also be comparable  
324 to proximity-based contacts identified through Bluetooth contact tracing apps, which may be  
325 preferred to real-location tracking for privacy reasons. We considered the sensitivity of the network  
326 to the contact definition by testing six further social networks from contacts defined using different  
327 threshold distances spanning the conceivable potential transmission range within the 5 min  
328 intervals (1 m to 7 m thresholds). We first measured the correlation of the network structure (i.e.

329 pairwise contacts) across the seven networks using Mantel tests. We also measured the  
330 correlation of each individual's degree (number of contacts), clustering coefficient (number of  
331 contacts also connected to one another), betweenness (number of shortest paths between nodes  
332 that pass through an individual), and eigenvector centrality (a measure that accounts both for a  
333 node's centrality and that of its neighbours) across the seven networks.

334

335 The Haslemere data is a temporal dataset spanning three full days. While the epidemic model we  
336 use is dynamic (see below Methods), the contagion process of COVID-19 operates over a longer  
337 time period than three days. To be able to meaningfully simulate longer-term outbreak dynamics,  
338 we quantified the data as a static social network in which edges indicate the propensities for social  
339 contact between nodes. Temporal information is incorporated by weighting the edges using the  
340 temporal contact information, instead of using a dynamic network which would require contact data  
341 over a much longer period. In the primary analysis, we weighted the edges as the number of  
342 unique days a dyad was observed together (but see Supplementary Information for other temporal  
343 definitions). Therefore, the weight score indicates the propensity for each dyad to engage in a  
344 social contact event on any given day, whereby 0 = no contact, 1 = 'weak links' observed on the  
345 minority of days (one third), 2 = 'moderate links' observed on the majority of days (two thirds), and  
346 3 = 'strong links' observed on all days. In this way, the weights of this social network could be  
347 included directly, and intuitively, into the dynamic epidemic model (see below). For sensitivity  
348 analysis, we also created other weightings for this network, and examined the correlation in dyadic  
349 social associations scores (using Mantel tests) with our primary weighting method (described  
350 above). Specifically, for the sensitivity analysis, we used edges specified as i) a binary (i.e.  
351 unweighted) network across all days, ii) a raw (and ranked) count of 5 min intervals in contact, iii) a  
352 transformed weighted count (edge weight transformed as  $1 - e^{-interval\ count}$ , which approximates  
353 a scenario where infection risk increases with contact time, but begins to level off after ~30mins of  
354 contact between dyads) and iv) a 'simple ratio index' (SRI) weighting that corrects for observation  
355 number as SRI score<sub>28</sub>. The SRI score for any two individuals (i.e. A and B) is calculated as:

356

357 (1) 
$$SRI_{A,B} = \frac{Obs_{A,B}}{Obs_A + Obs_B - Obs_{A,B}},$$

358

359 where *Obs* is the number of 5 min observation periods (the intervals since the start of the day)  
360 within which an individual is recorded within 4 m of another individual.

361

362 *Null network simulation approach*

363 We used null networks<sup>29</sup> to understand the network properties that shape predictions of COVID-19  
364 spread under different control scenarios. Null networks can also show how contagion may depend  
365 on the arrangement of social ties, how it may operate in different social environments, and which  
366 simulation approaches may be the most similar to real-world infection dynamics. We created four  
367 null network scenarios (Extended Data Fig. 9) with 1000 networks generated under each of these.  
368 All of the null network scenarios kept the same number of nodes, edges, and weights of these  
369 edges, as the Haslemere network, but were generated under the following nulls: (1) 'edge null'  
370 (Extended Data Fig. 9A) considered random social associates, allowing the edges of the network  
371 to be randomly allocated between all nodes; (2) 'degree null' (Extended Data Fig. 9B) considered  
372 individual differences in sociality but random social links between dyads, so randomly swapped the  
373 edges between nodes but maintained the degree distribution of the real network (and was,  
374 therefore, even more conservative than a power-law network simulation aiming to match real  
375 differences in sociality); (3) 'lattice null' (Extended Data Fig. 9C) considered triadic and tight clique  
376 associations, so created a ring-like lattice structure through assigning all edges into a ring-lattice  
377 where individuals are connected to their direct neighbours, and their neighbours of the second and  
378 third order (i.e. six links per individual), and then we randomly removed excess links (until the  
379 observed number of edges was reached); (4) 'cluster null' (Extended Data Fig. 9D) considered the  
380 observed level of clustering, so created a ring-lattice structure as described above but only  
381 between individuals observed as connected (at least 1 social link) in the real network, added  
382 remaining links (sampled from 4th order neighbours), and then rewired the edges until the real-  
383 world global clustering was observed (~20% rewiring; Extended Data Fig. 9D). These conservative  
384 (and informed) null models allowed connections to be arranged differently within the network but

385 maintained the exact same number of individuals, social connections and weights of these social  
386 connections at each simulation.

387

### 388 *Epidemic model*

389 Building on the epidemiological structure of a previous branching-process model<sup>13</sup>, we developed a  
390 full epidemic model to simulate COVID-19 dynamics across the Haslemere network. Full model  
391 parameters are given in Supplementary Table 1. For a given network of individuals, an outbreak is  
392 seeded by randomly infecting a given number of individuals (default = 1). The model then moves  
393 through daily time steps, with opportunities for infection on each day. All newly infected individuals  
394 are assigned an ‘onset time’ drawn from a Weibull distribution (mean = 5.8 days) that determines  
395 the point of symptom onset (for symptomatic individuals), and the point at which infectiousness is  
396 highest (for all individuals)<sup>12</sup>. Each individual is then simultaneously assigned asymptomatic status  
397 (whether they will develop symptoms at their onset time), as well as presymptomatic status  
398 (whether or not they will infect before their assigned onset time), drawn from Bernoulli distributions  
399 with defined probabilities (defaults = 0.4 and 0.2 respectively, see Supplementary Table 1). At the  
400 start of each day, individuals are assigned a status of susceptible, infectious or recovered (which  
401 would include deaths) based on their exposure time, onset time and recovery time (calculated as  
402 onset time plus seven days), and are isolated or quarantined based on their isolation/quarantine  
403 time (described below). The model then simulates infection dynamics over 70 days.

404

405 Possible infectors are all non-isolated and non-quarantined infectious individuals. Each day, all  
406 susceptible, non-isolated, non-quarantined contacts of all infectors within the network are at risk of  
407 being infected. The transmission rate for a given pair of contacts is modeled as:

408

$$409 \quad (2) \quad \lambda(t, s_i, p_i) = A_{s_i} I_{e_i} \int_{t-1}^t f(u; \mu_i, \alpha_{p_i}, \omega_{p_i}) du$$

410

411 where  $t$  is the number of days since the infector  $i$  was exposed,  $s_i$  and  $p_i$  are the infector’s  
412 symptom status (asymptomatic yes/no, and presymptomatic yes/no, respectively).  $A_{s_i}$  is the scaling



413 factor for the infector's symptomatic status (Supplementary Table 1) and  $I_{ei}$  is the weighting of the  
414 edge in the network (i.e. number of days observed together) between the infector and the  
415 susceptible individual. The probability density function  $f(u; \mu_i, \alpha_{p_i}, \omega_{p_i})$  corresponds to the  
416 generation time, which is drawn from a skewed normal distribution (see 13 for details). Briefly, this  
417 uses the infector's onset time as the location parameter  $\mu_i$ , while the slant parameter  $\alpha_{p_i}$  and the  
418 scale parameter  $\omega_{p_i}$  both vary according to the infector's presymptomatic transmission status  
419 (Supplementary Table 1). This enabled us to simulate a predefined rate of presymptomatic  
420 transmission, while retaining a correlation structure between onset time and infectiousness, and  
421 avoiding a scenario whereby a large number of individuals were highly infectious on the first day of  
422 exposure (see Supplementary Table 1 and data sharing for more details).

423  
424 Using this transmission rate, the probability of infection between a susceptible-infected pair of  
425 individuals  $t$  days after the infector's exposure time is then modeled as:

426  
427 (3) 
$$P(t, s_i, p_i) = 1 - e^{-\lambda(t, s_i, p_i)}$$

428  
429 Note that the change in status from "infectious" to "recovered" at seven days after symptom onset  
430 does not affect infection dynamics (as transmission rate  $\approx 0$  seven days after onset time in our  
431 model), but is instead used for contact tracing purposes (see below). To test how the above rate of  
432 infection related to the reproduction number  $R_0$  and the observed generation times, we generated  
433 empirical estimates of the number of secondary infections in the early outbreak stages of the  
434 model. We ran 1000 trial simulations from a random single starting infector and quantified i) the  
435 mean number of secondary infections from this case, and ii) the time at which each secondary  
436 case was infected. We multiplied the rate of infection by a scaling parameter to get a baseline  $R_0$  of  
437 2.8, although we also performed sensitivity analysis (Supplementary Table 1). The mean  
438 generation time using this method was 6.3 days (median = 6 days). These basic parameters  
439 correspond closely to published estimates<sup>12,30</sup>.

440

441 In addition to the infection rate from within the network, the infection rate from outside the network  
442 is also simulated daily by randomly infecting susceptible individuals with a probability of 0.001  
443 (although we also performed sensitivity analysis of this parameter).

444

445 We simulated different contact tracing scenarios using contact information from the network, with  
446 the aim of evaluating both app-based and manual contact tracing strategies. Primary and  
447 secondary contacts of individuals are identified from the network on the day of the infector's  
448 symptom onset and, as such, contacts of asymptomatic infectors are not traced. Contacts who  
449 have already recovered are excluded. Susceptible contacts are traced with a given probability (0.3-  
450 0.9 tested - see Supplementary Table 1). We assume that this probability captures a wide range of  
451 reasons why contacts might not be traced, and it thus acts as an intuitive simplification.

452

453 The isolation and/or quarantine time of each individual is determined based on their infection  
454 status, their symptomatic status, whether they have been traced, and the control scenario. We  
455 consider four control scenarios: i) no control, where no individuals are isolated or quarantined, ii)  
456 case isolation, where individuals isolate upon symptom onset after a delay period, iii) primary  
457 contact tracing with quarantine, where individuals isolate upon symptom onset (after a delay) and  
458 traced contacts are quarantined upon their infector's symptom onset (also after a delay), and iv)  
459 secondary contact tracing, as scenario iii) but including contacts of contacts. All isolated and  
460 quarantined individuals are contained for 14 days.

461

462 Finally, we simulated a range of testing efforts for SARS-CoV-2. Each individual is assigned a  
463 testing time on isolation or quarantine, with the delay between containment and testing sampled  
464 from a Weibull distribution. A cap of the maximum number of daily tests is assigned, and each day  
465 up to this number of individuals are randomly selected for testing. Test results are dependent on  
466 infection and asymptomatic status, with a false negative rate (i.e. the probability that an infectious  
467 case will test negative) 0.1<sup>21</sup>, and a false positive rate (i.e. the probability that susceptible case will

468 test positive) of 0.02<sub>22</sub>. Cases who tested negative were immediately released from  
469 isolation/quarantine.

470

471 A set of default parameters were chosen to represent a relatively optimistic model of contact  
472 tracing, which included a short time delay between symptom onset/tracing and isolation/quarantine  
473 (1-2 days), and a high proportion (90%) of contacts traced within this tracked population (default  
474 parameters highlighted in bold in Supplementary Table 1). We assumed that the probability of  
475 tracing was constant over time, and therefore independent of previous isolation/quarantine events,  
476 and that all individuals remained in quarantine for the full 14 days, unless released via testing. We  
477 performed sensitivity tests on all relevant parameters (Supplementary Table 1). To examine how  
478 infection dynamics were affected by network structure, we ran epidemic simulations on each of the  
479 null networks described above. We also ran simulations on networks generated using higher (7m  
480 and 16m) distance thresholds for defining a contact. These networks were 20% and 100% more  
481 dense, respectively, and therefore provide an estimate of the robustness of our simulations to  
482 missing contacts.

483

484 We ran each simulation for 70 days, at which point the majority of new infections came from  
485 outside the network (see results), with all scenarios replicated 1000 times. With the null networks  
486 (above) and physical distancing simulations (below), we ran one replicate simulation on each of  
487 1000 simulated networks. In no simulations were all individuals in the population infected under our  
488 default settings. Therefore, for each simulation we report the number of cases per week, and  
489 quantify the total number of cases after 70 days as a measure of outbreak severity. To present the  
490 level of isolation and quarantine required under different scenarios, we calculate the number of  
491 people contained on each day of the outbreak, and average this over weeks to get weekly changes  
492 in the daily rates of isolations and quarantines.

493

494 *Physical distancing Simulations*

495 We simulated a population-level physical distancing effort, whereby a given proportion of the ‘weak  
496 links’ are removed (edges only observed on a single day; Extended Data Fig. 10A-D). This is akin  
497 to a simple situation whereby individuals reduce their non-regular contacts (e.g. to people outside  
498 of their household or other frequently visited settings such as workplaces). As further  
499 supplementary analysis, we also carried out a more complex physical distancing simulation,  
500 whereby the weak links that were removed were randomly reassigned to existing contacts  
501 (Extended Data Fig. 10E-G). This represents a scenario where individuals reduce their non-regular  
502 contacts but spend more time with regular contacts.

503

504 The epidemic model code can be accessed at: <https://github.com/biouea/covidhm>

505

## 506 **Acknowledgements**

507 This work was instigated through the Royal Society’s Rapid Assistance in Modelling the Pandemic  
508 (RAMP) scheme. We thank Michael Pointer for helpful discussions throughout, and Cock van  
509 Oosterhout and Julia Gog for comments on the manuscript. We thank all those in Haslemere who  
510 took part in the BBC Pandemic study. We thank Hannah Fry and 360 Production, especially  
511 Danielle Peck and Cressida Kinnear, for making possible the collection of the dataset that  
512 underlies this work, and Andrew Conlan, Maria Tang, and Julia Gog for their contribution to the  
513 BBC study. JAF was supported by a research fellowship from Merton College and BBSRC  
514 (BB/S009752/1) and acknowledges funding from NERC (NE/S010335/1). PK was in part funded by  
515 the Royal Society under award RPEA180004 and European Commission: 101003688. AJK was  
516 supported by a Sir Henry Dale Fellowship jointly funded by the Wellcome Trust and the Royal  
517 Society (grant Number 206250/Z/17/Z).

518

## 519 **Data availability**

520 This study used the raw data previously published in Kissler et al. 2018 (made available with full  
521 description here: <https://www.biorxiv.org/content/10.1101/479154v1>). The data used here are  
522 publicly available with the code

523

524 **Code availability**

525 The code and data used to produce the simulations is available as an R package at:

526 <https://github.com/biouea/covidhm>. A shiny app which runs individual outbreak simulations is

527 available at: [https://biouea.shinyapps.io/covidhm\\_shiny/](https://biouea.shinyapps.io/covidhm_shiny/)

528

529 **References**

530

531 **Author contributions**

532 J.A.F. A.J.K. and L.G.S. conceived the study; J.A.F. carried out the social network analysis, with

533 input from P.K., S.K., A.J.K and L.G.S; L.G.S. built the epidemic network model with input from

534 J.A.F., J.H., S.K., P.K. and A.J.K; J.A.F. and L.G.S. wrote the first draft of the manuscript; All

535 authors interpreted the results, contributed to writing and approved the final version for submission.

536

537 **Competing interests**

538 The authors declare no competing interests

539 **Tables and Figures**

540

541 **Table 1** Policy summary

|                               |                                                                                                                                                                                                                                                                                                                                                                                                                                                                                                                                                                                                                                                                                                                                                                                                                                              |
|-------------------------------|----------------------------------------------------------------------------------------------------------------------------------------------------------------------------------------------------------------------------------------------------------------------------------------------------------------------------------------------------------------------------------------------------------------------------------------------------------------------------------------------------------------------------------------------------------------------------------------------------------------------------------------------------------------------------------------------------------------------------------------------------------------------------------------------------------------------------------------------|
| Background                    | Understanding how isolation, contact tracing and other non-pharmaceutical interventions can combine effectively and efficiently is crucial to COVID-19 control. Such interventions are likely to depend on contact patterns within a population. We developed an epidemic model that simulates COVID-19 outbreaks in a real-world network, and assess the impact of a range of testing, isolation, quarantine and contact tracing strategies for controlling these outbreaks.                                                                                                                                                                                                                                                                                                                                                                |
| Main findings and limitations | We found that isolation, contact tracing and quarantine reduced simulated outbreak size in our local-scale network. Tracing and quarantining contacts of contacts was more effective, but required large numbers of individuals are required to be quarantined. This strategy is therefore often similar to introducing a 'local lockdown'. Testing and releasing quarantined individuals reduced the numbers quarantined, but also the effectiveness of control measures. Combining physical distancing with contact tracing resulted in reduced outbreak size, with fewer individuals required to quarantine. A major limitation of this study is that it is based on pre-COVID-19 data from a sample of individuals from a single town; more data are therefore needed to fully understand potential outbreak dynamics in other settings. |
| Policy implications           | Our findings suggest that effective contact tracing measures may require large numbers of people in a community to be quarantined, with individual-level tracing resulting in scenarios equivalent to broader localised lockdowns. Targeted tracing and quarantine strategies may therefore be more efficient when combined with other control measures such as physical distancing.                                                                                                                                                                                                                                                                                                                                                                                                                                                         |

542

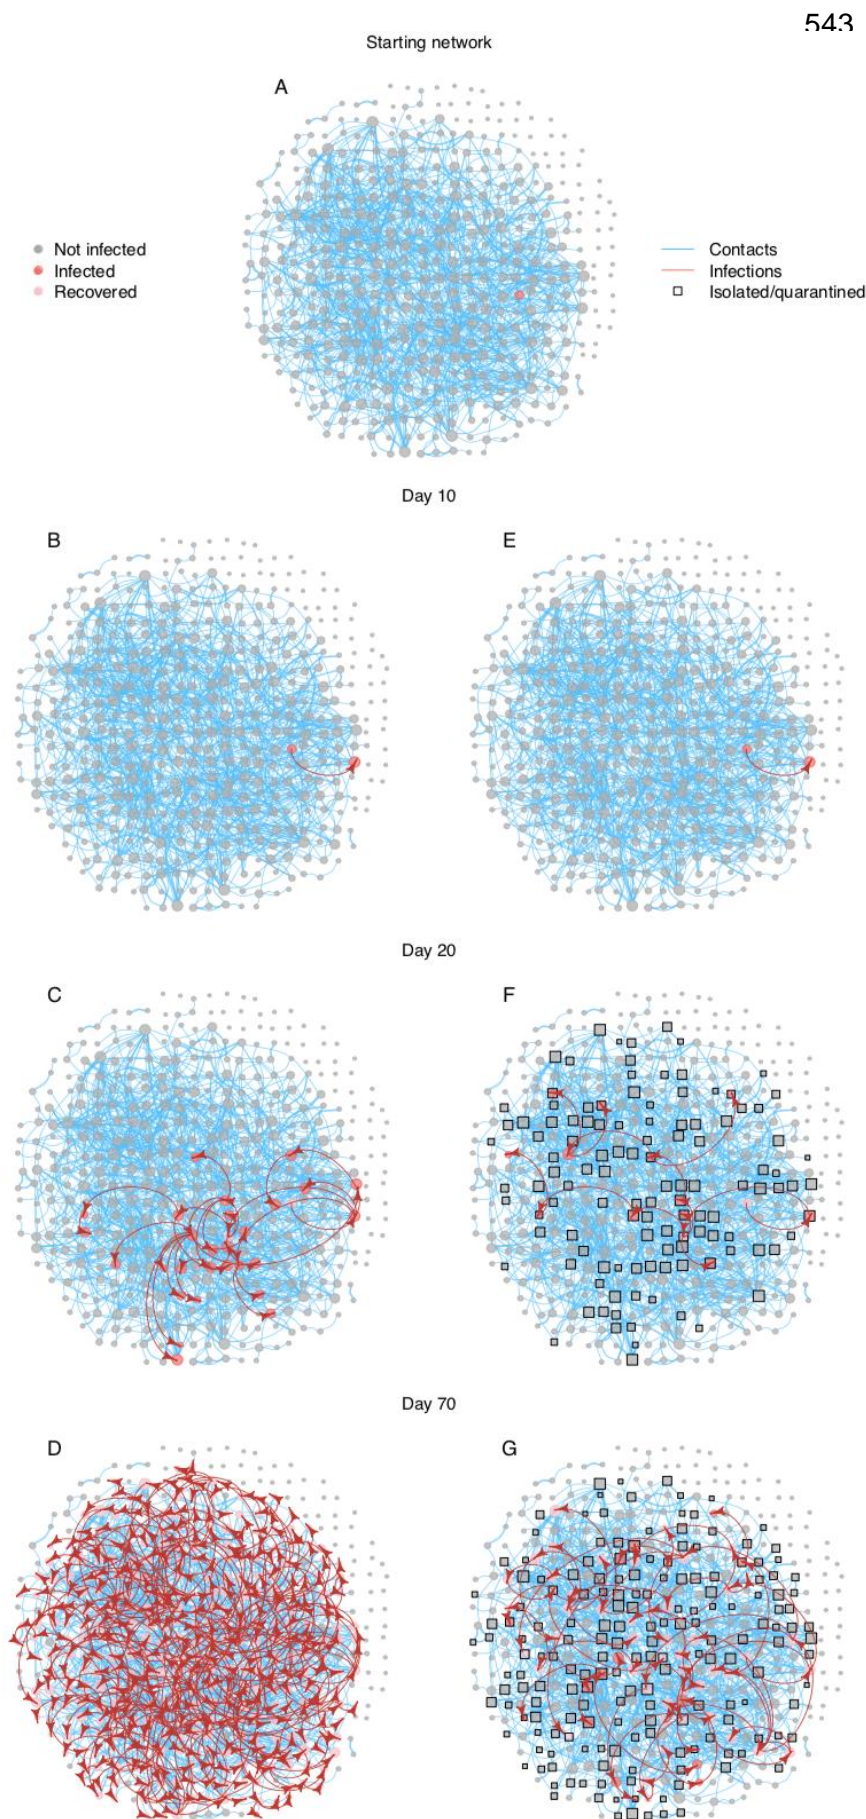

543

**Figure 1** Illustration of the Haslemere network with epidemic simulation predictions. **A** The social network of 468 individuals (grey nodes) with 1257 social links (blue edges) weighted by 1616 daily contacts (edge thickness) and a single starting infector (red). Subsequent panels show progression of the COVID-19 epidemic under the no intervention (**B,C,D**) and the secondary contact tracing (**E,F,G**) scenarios. Red arrows show an infection route, and squares show isolated/quarantined individuals.

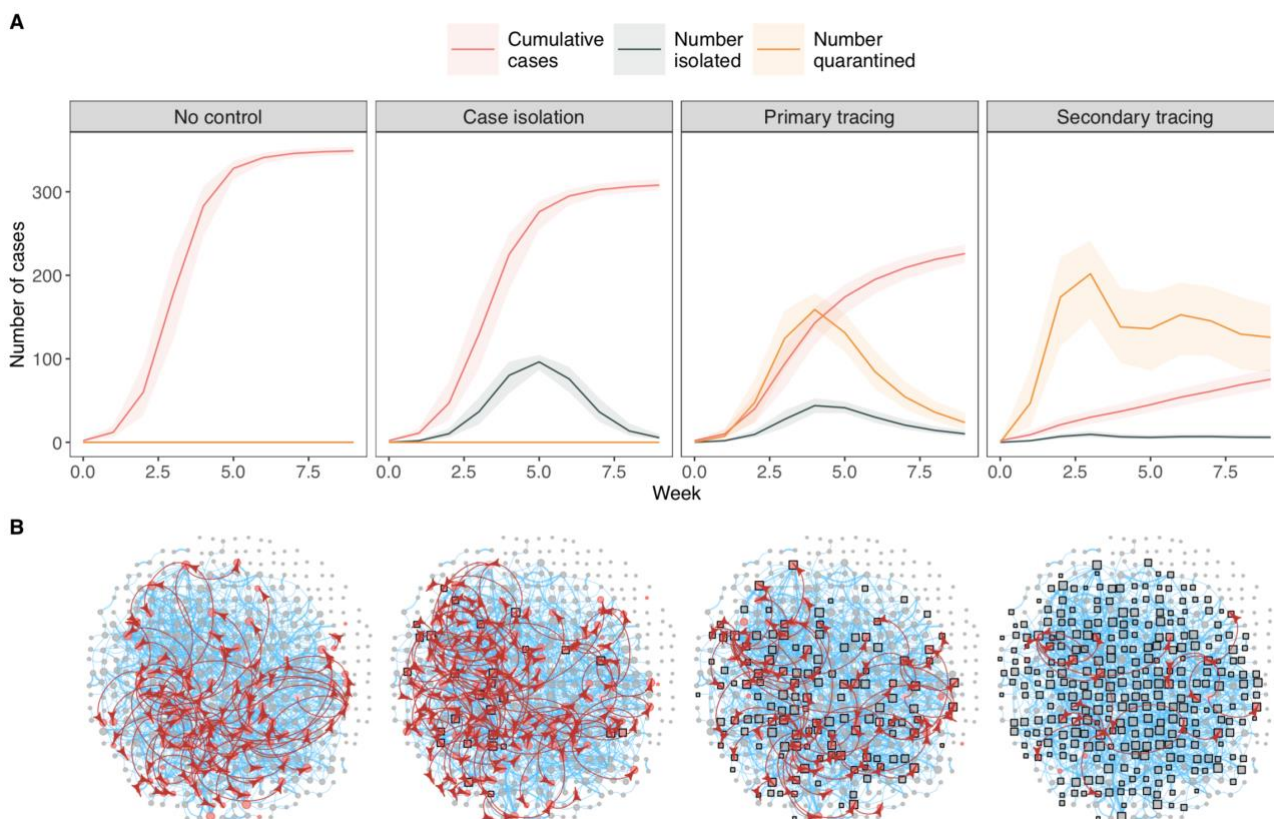

566

567 **Figure 2** Epidemic model predictions of outbreak size and number of people isolated/quarantined  
568 under different non-pharmaceutical intervention scenarios in the Haslemere network. **A** cumulative  
569 number of cases, number of people isolated, and number of people quarantined at a given point in  
570 time under each scenario. Lines and shaded areas represent median and interquartile range from  
571 1000 simulations. **B** Example networks from a single simulation of each scenario at day 20 of the  
572 outbreak. See figure 1 for network details.

573

574



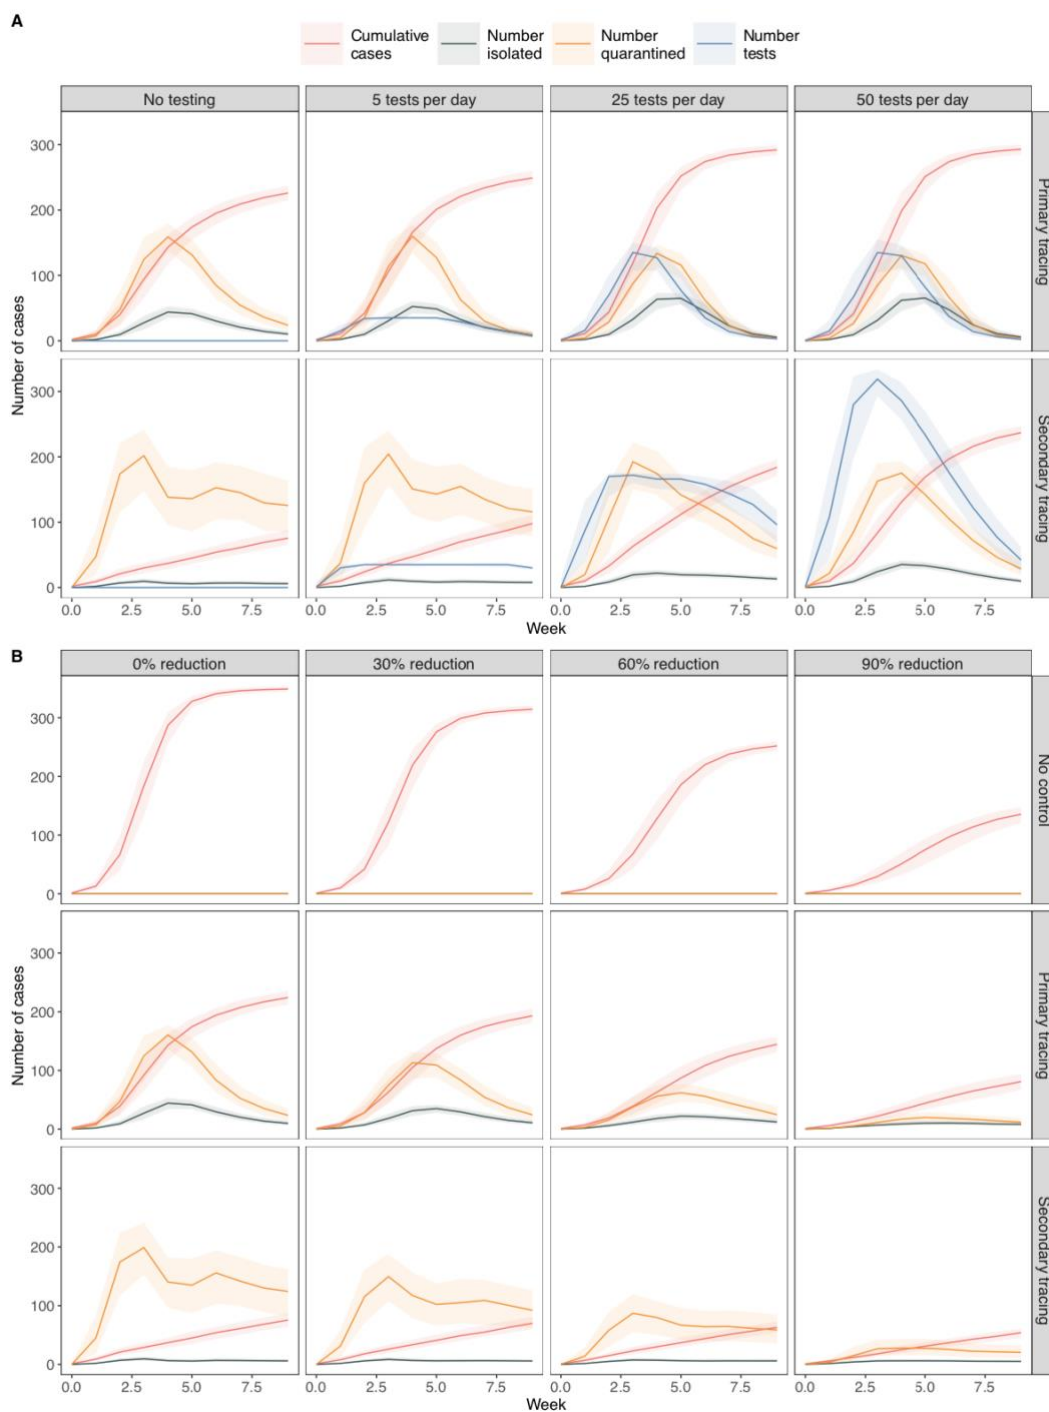

575

576 **Figure 3 A** Epidemic model simulations of outbreak size and number of people isolated and  
 577 quarantined under **A** different levels of testing and **B** physical distancing in the Haslemere network.

578 In **A**, Tests are plotted per week rather than per day for visualisation purposes. In **B** The  
 579 percentage reduction refers to the number of 'weak links' removed from the networks (see  
 580 methods). Lines and shaded areas represent median and interquartile range from 1000  
 581 simulations.

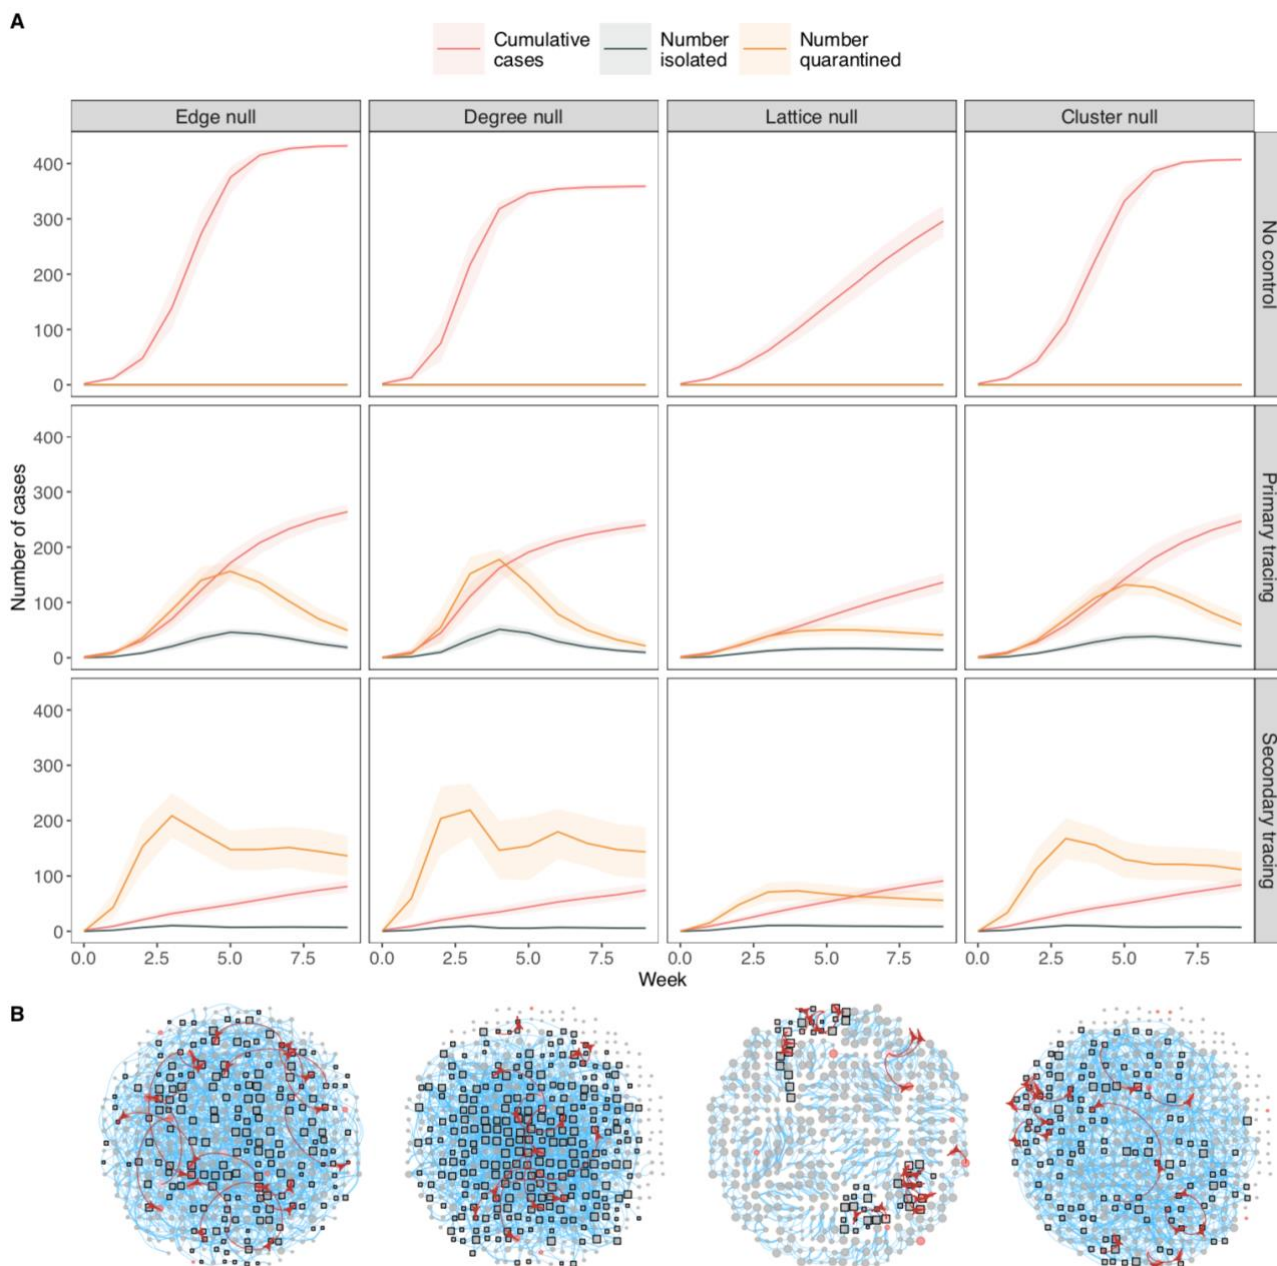

582

583 **Figure 4 A** Epidemic model simulations of outbreak size and number of people isolated and  
 584 quarantined under different null-network permutations based on the Haslemere network (see  
 585 methods for details). Lines and shaded areas represent median and interquartile range from 1000  
 586 simulations. **B** Example networks showing an infection simulation (with secondary contact tracing,  
 587 after 20 days) on each null network. See Figure 1 for network details.
